# Supplementary material for: Immunoinformatics-Based Identification of B and T Cell Epitopes in RNA-Dependent RNA Polymerase of SARS-CoV-2
Source: MDPI journal article supplement (doi:10.3390/vaccines10101660), 2022-10-03
Supplement: s1 [file s1]

# **Title: Immunoinformatics based identification of B and T-Cell epitopes in RNA dependent RNA polymerase of SARS-CoV-2**

**Shabir Ahmad Mir <sup>1\*</sup>, Mohammed Alaidarous <sup>1,2</sup>, Bader Alshehri <sup>1</sup>, Abdul Aziz Bin Dukhyil <sup>1</sup>, Saeed Banawas <sup>1,2,3</sup>, Yahya Madkhali <sup>1</sup>, Suliman A Alsagaby<sup>1</sup>, Ayoub Al Othaim <sup>1</sup>**

<sup>1</sup> Department of Medical Laboratory Sciences, College of Applied Medical Science, Majmaah University, Al Majmaah-11952, Saudi Arabia

<sup>2</sup> Health and Basic Sciences Research Center, Majmaah University, Al Majmaah 11952, Saudi Arabia

<sup>3</sup> Department of Biomedical Sciences, Oregon State University, Corvallis, OR 97331, USA

## **\* Address for correspondence**

Dr Shabir Ahmad Mir

Assistant Professor

Department of Medical Laboratory Sciences,  
College of Applied Medical Science,  
Majmaah University, Saudi Arabia.

Phone: +966536300645

Email: s.mir@mu.edu.sa

**Supplementary Table S1.** B-cell epitopes predicted using the BCPREDS server along with their VaxiJen score.

| <b>S No</b> | <b>Starting amino acid Position</b> | <b>Amino acid sequence of the Peptide epitope</b> | <b>BCPREDS server Score</b> | <b>VaxiJen score</b> |
|-------------|-------------------------------------|---------------------------------------------------|-----------------------------|----------------------|
| <b>1</b>    | 219                                 | FGDFIQTPGSGVPVV                                   | 0.996                       | 0.3090               |
| <b>2</b>    | 908                                 | TNDNTSRYWEPEFYEA                                  | 0.994                       | 0.0979               |
| <b>3</b>    | 677                                 | PGGTSSGDATTAYANS                                  | 0.989                       | 0.2651               |
| <b>4</b>    | 443                                 | AQDGNAAISDYDYRY                                   | 0.987                       | 0.5716               |
| <b>5</b>    | 20                                  | TPCGTGTSTDVVYRAF                                  | 0.986                       | 0.3946               |
| <b>6</b>    | 794                                 | MSEAKCWTETDLTKGP                                  | 0.981                       | 0.5943               |
| <b>7</b>    | 477                                 | DKYFDCYDGGCINANQ                                  | 0.973                       | 0.6443               |
| <b>8</b>    | 821                                 | KQGDDYVYLPYPDPSR                                  | 0.973                       | 0.0896               |
| <b>9</b>    | 866                                 | AYPLTKHPNQEYADV                                   | 0.973                       | 0.1365               |
| <b>10</b>   | 283                                 | FDRYFKYWDQTYHPNC                                  | 0.959                       | 0.3082               |
| <b>11</b>   | 135                                 | DEGNCDTLKEILVTYN                                  | 0.942                       | -0.1097              |
| <b>12</b>   | 347                                 | HFRELGVVHNQDVNLH                                  | 0.938                       | 1.4181               |
| <b>13</b>   | 48                                  | FLKTNCCRFQEKDEDD                                  | 0.919                       | 0.5726               |

**Supplementary Table S2.** Top 40 HTL epitopes of RdRP predicted using IEDB server with their VaxiJen score.

| S No | Amino acid (AA) sequence of the Peptide epitope | HLA allele to which epitope can bind | Starting AA Position | Percentile Rank | Vaxijen Score |
|------|-------------------------------------------------|--------------------------------------|----------------------|-----------------|---------------|
| 1    | AMPNMLRIMASLVLA                                 | HLA-DRB1*15:01                       | 205                  | 0.01            | 0.096         |
| 2    | MPNMLRIMASLVLAR                                 | HLA-DRB1*15:01                       | 206                  | 0.01            | 0.1001        |
| 3    | NMLRIMASLVLARKH                                 | HLA-DRB1*15:01                       | 208                  | 0.01            | 0.4897        |
| 4    | PNMLRIMASLVLARK                                 | HLA-DRB1*15:01                       | 207                  | 0.01            | 0.4128        |
| 5    | RAMPNMLRIMASVL                                  | HLA-DRB1*15:01                       | 204                  | 0.01            | 0.0255        |
| 6    | NEFYAYLRKHFSMMI                                 | HLA-DRB1*11:01                       | 323                  | 0.02            | 0.2279        |
| 7    | EFYAYLRKHFSMMIL                                 | HLA-DRB1*11:01                       | 324                  | 0.05            | 0.39          |
| 8    | VNEFYAYLRKHFSMM                                 | HLA-DRB1*11:01                       | 322                  | 0.05            | 0.1645        |
| 9    | QMNLKYAISAKNRAR                                 | HLA-DPA1*02:01/DPB1*14:01            | 121                  | 0.07            | 1.5044        |
| 10   | MNLKYAISAKNRART                                 | HLA-DPA1*02:01/DPB1*14:01            | 122                  | 0.08            | 1.4377        |
| 11   | FVNEFYAYLRKHFSM                                 | HLA-DRB1*11:01                       | 321                  | 0.11            | 0.0518        |
| 12   | TQMNLKYAISAKNRA                                 | HLA-DPA1*02:01/DPB1*14:01            | 120                  | 0.11            | 1.4529        |
| 13   | QKLLKSIAATRGATV                                 | HLA-DPA1*02:01/DPB1*14:01            | 153                  | 0.12            | 0.0888        |
| 14   | NMLRIMASLVLARKH                                 | HLA-DPA1*02:01/DPB1*14:01            | 208                  | 0.13            | 0.4897        |
| 15   | PNMLRIMASLVLARK                                 | HLA-DPA1*02:01/DPB1*14:01            | 207                  | 0.14            | 0.4128        |
| 16   | HQKLLKSIAATRGAT                                 | HLA-DPA1*02:01/DPB1*14:01            | 152                  | 0.15            | 0.0799        |
| 17   | KLLKSIAATRGATVV                                 | HLA-DPA1*02:01/DPB1*14:01            | 154                  | 0.15            | 0.1825        |
| 18   | NLKYAISAKNRARTV                                 | HLA-DPA1*02:01/DPB1*14:01            | 123                  | 0.15            | 1.3422        |
| 19   | DSYSSLMPILTLTR                                  | HLA-DRB1*01:01                       | 25                   | 0.16            | 0.5134        |
| 20   | FHQKLLKSIAATRGA                                 | HLA-DPA1*02:01/DPB1*14:01            | 151                  | 0.16            | 0.2173        |
| 21   | SYSSLMPILTLTRA                                  | HLA-DRB1*01:01                       | 26                   | 0.16            | 0.5509        |
| 22   | VDSYSSLMPILTLT                                  | HLA-DRB1*01:01                       | 24                   | 0.16            | 0.5149        |
| 23   | VVDSYSSLMPILTL                                  | HLA-DRB1*01:01                       | 23                   | 0.16            | 0.4474        |
| 24   | KELLVYAADPAMHAA                                 | HLA-DRB3*01:01                       | 159                  | 0.2             | 0.1356        |
| 25   | MLRIMASLVLARKHT                                 | HLA-DPA1*02:01/DPB1*14:01            | 209                  | 0.2             | 0.5283        |
| 26   | DFVNEFYAYLRKHFS                                 | HLA-DRB1*11:01                       | 320                  | 0.22            | 0.0385        |
| 27   | MLRIMASLVLARKHT                                 | HLA-DRB1*15:01                       | 209                  | 0.22            | 0.5283        |
| 28   | PVVDYSSLMPILT                                   | HLA-DRB1*01:01                       | 22                   | 0.24            | 0.4117        |
| 29   | NFNVLFTVPPTSF                                   | HLA-DPA1*01:03/DPB1*04:01            | 102                  | 0.3             | 0.5021        |
| 30   | FKELLVYAADPAMHA                                 | HLA-DRB3*01:01                       | 158                  | 0.31            | 0.0669        |
| 31   | PNMLRIMASLVLARK                                 | HLA-DRB1*01:01                       | 207                  | 0.31            | 0.4128        |
| 32   | LRIMASLVLARKHTT                                 | HLA-DPA1*02:01/DPB1*14:01            | 210                  | 0.32            | 0.6646        |
| 33   | MPNMLRIMASLVLAR                                 | HLA-DPA1*02:01/DPB1*14:01            | 206                  | 0.34            | 0.1001        |
| 34   | LPILTTLTRALTAES                                 | HLA-DRB1*08:02                       | 31                   | 0.37            | 0.4225        |
| 35   | VFHLYLQYIRKLHDE                                 | HLA-DRB4*01:01                       | 460                  | 0.37            | 0.2814        |
| 36   | DVFHLYLQYIRKLHD                                 | HLA-DRB4*01:01                       | 459                  | 0.38            | 0.3189        |
| 37   | MPILTTLTRALTAESH                                | HLA-DRB1*08:02                       | 32                   | 0.38            | 0.3258        |
| 38   | FHLYLQYIRKLHDEL                                 | HLA-DRB4*01:01                       | 461                  | 0.39            | 0.3059        |
| 39   | ITQMNLKYAISAKNR                                 | HLA-DPA1*02:01/DPB1*14:01            | 119                  | 0.41            | 1.5061        |
| 40   | MPNMLRIMASLVLAR                                 | HLA-DRB1*01:01                       | 206                  | 0.41            | 0.1001        |

**Supplementary Table S3.** CTL epitopes predicted using NetCTL 1.2 server with their VaxiJen score and ToxinPred server report.

| A2 supertype binding peptides | Start | VaxiJen score | A3 supertype binding peptides | Start | VaxiJen score | B7 supertype binding peptides | Start | VaxiJen score |
|-------------------------------|-------|---------------|-------------------------------|-------|---------------|-------------------------------|-------|---------------|
| TMADLVYAL                     | 123   | 0.8208        | RLYYDSMSY                     | 513   | -0.1146       | FPPTSFGPL                     | 321   | 1.6296        |
| LMIERFVSL                     | 854   | -0.0605       | HLYLQYIRK                     | 882   | 0.492         | VPHISRQRL                     | 111   | 0.1685        |
| FVNEFYAYL                     | 741   | -0.4788       | KLFDRYFKY                     | 281   | -0.0533       | KPYIKWDLL                     | 263   | 0.4825        |
| NLIDSYFVV                     | 64    | 0.4282        | RQFHQKLLK                     | 569   | -1.0437       | AVTANVNAL                     | 699   | 0.3733        |
| ILHCANFNV                     | 307   | 0.5385        | KSAGFPFNK                     | 500   | 1.1874        | KARLYYDSM                     | 511   | -0.0551       |
| MLDMYSVML                     | 899   | 0.5626        | TSFGPLVRK                     | 324   | 1.7142        | MPNMLRIMA                     | 626   | -0.2116       |
| NMLRIMASL                     | 628   | -0.3326       | MTNRQFHQK                     | 566   | 0.5341        | YVRNLQHRL                     | 719   | -0.4066       |
| YTMADLVYA                     | 122   | 1.0142        | MVMCGGSLY                     | 666   | -0.259        | IPTITQMNL                     | 536   | 0.7997        |
| FVDGVPFVV                     | 334   | 0.1285        | HISRQRLTK                     | 113   | -0.8467       | ATRGTAVVI                     | 581   | 0.5688        |
| LLMPILTTL                     | 240   | 0.5803        | IMASLVLAR                     | 632   | 0.5587        | TPCGTGTST                     | 20    | 0.7838        |
| SLSHRFYRL                     | 647   | 0.4779        | AVAKHDFFK                     | 95    | -0.8254       | LPYPDPSRI                     | 829   | -0.1931       |
| SLAIDAYPL                     | 861   | 0.7576        | LVASIKNFK                     | 775   | 0.8148        | CPAVAKHDF                     | 93    | 1.1025        |
| RQLLFVVEV                     | 467   | 0.816         | HLMGWDPYK                     | 613   | -0.2495       | YLRKHFSMM                     | 748   | 0.4887        |
| NLLKDCPAV                     | 88    | -0.5347       | LIDSYFVVK                     | 65    | 0.4939        | RVRQALLKT                     | 181   | -0.5069       |
| SVFNICQAV                     | 692   | -0.416        | RVYANLGER                     | 173   | 0.6654        | MPILTTLRA                     | 242   | 0.8061        |
| MILSDDAVV                     | 756   | -0.1842       | KNFKSVLYY                     | 780   | 0.1643        | IAATRGTATV                    | 579   | 0.8883        |
| SLLMPILTTL                    | 239   | 0.2133        | MASLVLARK                     | 633   | 1.3011        | AALTNNVAF                     | 399   | 0.6381        |
| VMCGGSLYV                     | 667   | -0.2332       | CSQHTMLVK                     | 813   | 0.1398        | RAMPNMLRI                     | 624   | 0.0566        |
| RLANECAQV                     | 654   | 0.9246        | LSFKELLVY                     | 366   | 0.7234        | KPGNFNKDF                     | 411   | 0.8932        |
| KQGDDYVYL                     | 821   | 0.4041        | TVKPGNFNK                     | 409   | 1.3778        | GPLVRKIFV                     | 327   | -0.0569       |
| QLLFVVEVV                     | 468   | 0.821         | AIDAYPLTK                     | 863   | 0.5972        | SAKNRARTV                     | 549   | 0.9661        |
| RIMASLVLA                     | 631   | 0.1241        | FAVSKGFFK                     | 422   | -0.2311       | SIKNFKSVL                     | 778   | 0.2414        |
| SVLYYQNNV                     | 784   | 0.5524        | CSLSHRFYR                     | 646   | 0.629         | FAYTKRNV                      | 528   | 1.0296        |
| YADVFLHLY                     | 877   | 0.0159        | TITQMNLKY                     | 538   | 1.6155        | YIRKLHDEL                     | 887   | -0.2677       |
| RLSFKELLV                     | 365   | 0.8643        | ISRQRLTKY                     | 114   | -0.6868       | IERFVSLAI                     | 856   | 0.1775        |
| HMLDMYSVM                     | 898   | 0.5853        | LLKSIAATR                     | 575   | 0.2055        |                               |       |               |
| VVDSYYSLL                     | 233   | 0.5381        | RVCVSAAR                      | 10    | 0.6078        |                               |       |               |
| AMYTPHTVL                     | 923   | 0.1196        | ATVVIGTSK                     | 585   | 0.7566        |                               |       |               |
| SVAALTNNV                     | 397   | 0.3839        | RAFDIYNKD                     | 33    | 0.5993        |                               |       |               |
| MMILSDDAV                     | 755   | -0.1616       | TLKEILVTY                     | 141   | 0.1118        |                               |       |               |
| KLLKSIAAT                     | 574   | -0.4372       | LTNDNTSRY                     | 907   | -0.3497       |                               |       |               |
| KLFDRYFKY                     | 281   | -0.0533       | ASGNLLLDK                     | 383   | -0.4206       |                               |       |               |
| RILGAGCFV                     | 836   | 0.3846        | NLKYAISAK                     | 543   | 1.3508        |                               |       |               |
| VTANVNALL                     | 700   | 0.1708        | VAGFAKFLK                     | 42    | -0.7456       |                               |       |               |
| FMSEAKCWT                     | 793   | 0.3756        | ALLSTDGKN                     | 706   | -0.1557       |                               |       |               |
|                               |       |               | MLTNDNTSR                     | 906   | -0.3109       |                               |       |               |
|                               |       |               | SQGLVASIK                     | 772   | 0.6336        |                               |       |               |
|                               |       |               | VVIGTSKFY                     | 587   | 0.7146        |                               |       |               |
|                               |       |               | LMPILTLTR                     | 241   | 0.9617        |                               |       |               |
|                               |       |               | RLSFKELLV                     | 365   | 0.8643        |                               |       |               |
|                               |       |               | VVSTGYHFR                     | 341   | 1.4741        |                               |       |               |
|                               |       |               | VVYRAFDIY                     | 30    | 0.7331        |                               |       |               |
|                               |       |               | DVFHLYLQY                     | 879   | 0.6321        |                               |       |               |
|                               |       |               | MVPHISRQR                     | 110   | 0.4279        |                               |       |               |
|                               |       |               | SICSTMTNR                     | 561   | 1.1164        |                               |       |               |
|                               |       |               | RIMASLVLA                     | 631   | 0.1241        |                               |       |               |
|                               |       |               | YIKWDLLKY                     | 265   | -0.321        |                               |       |               |
|                               |       |               | KLHDELTHG                     | 890   | 0.4147        |                               |       |               |

**Supplementary Table S4.** ToxinPred report for CTL epitopes having VaxiJen score above the threshold of 0.4

| <b>A2 supertype binding peptides</b>       |                      |                         | <b>A3 supertype binding peptides</b>       |                      |                         | <b>B7 supertype binding peptides</b>       |                      |                         |
|--------------------------------------------|----------------------|-------------------------|--------------------------------------------|----------------------|-------------------------|--------------------------------------------|----------------------|-------------------------|
| <b>Amino acid sequence of the peptides</b> | <b>VaxiJen score</b> | <b>ToxinPred report</b> | <b>Amino acid sequence of the peptides</b> | <b>VaxiJen score</b> | <b>ToxinPred report</b> | <b>Amino acid sequence of the peptides</b> | <b>VaxiJen score</b> | <b>ToxinPred report</b> |
| <b>TMADLVYAL</b>                           | 0.8208               | Non-Toxin               | <b>HLYLQYIRK</b>                           | 0.492                | Non-Toxin               | <b>FPPTSFGPL</b>                           | 1.6296               | Non-Toxin               |
| <b>NLIDSYFVV</b>                           | 0.4282               | Non-Toxin               | <b>KSAGFPFNK</b>                           | 1.1874               | Non-Toxin               | <b>KPYIKWDLL</b>                           | 0.4825               | Non-Toxin               |
| <b>ILHCANFNV</b>                           | 0.5385               | Non-Toxin               | <b>TSFGPLVRK</b>                           | 1.7142               | Non-Toxin               | <b>IPITITQMNL</b>                          | 0.7997               | Non-Toxin               |
| <b>MLDMYSVML</b>                           | 0.5626               | Non-Toxin               | <b>MTNRQFHQK</b>                           | 0.5341               | Non-Toxin               | <b>ATRGATVVI</b>                           | 0.5688               | Non-Toxin               |
| <b>YTMADLVYA</b>                           | 1.0142               | Non-Toxin               | <b>IMASLVLAR</b>                           | 0.5587               | Non-Toxin               | <b>TPCGTGTST</b>                           | 0.7838               | Non-Toxin               |
| <b>LLMPILTLT</b>                           | 0.5803               | Non-Toxin               | <b>LVASIKNFK</b>                           | 0.8148               | Non-Toxin               | <b>CPAVAKHDF</b>                           | 1.1025               | Non-Toxin               |
| <b>SLSHRFYRL</b>                           | 0.4779               | Non-Toxin               | <b>LIDSYFVVK</b>                           | 0.4939               | Non-Toxin               | <b>YLRKHFSMM</b>                           | 0.4887               | Non-Toxin               |
| <b>SLAIDAYPL</b>                           | 0.7576               | Non-Toxin               | <b>RVYANLGER</b>                           | 0.6654               | Non-Toxin               | <b>MPILTLTRA</b>                           | 0.8061               | Non-Toxin               |
| <b>RQLLFVVEV</b>                           | 0.816                | Non-Toxin               | <b>MASLVLARK</b>                           | 1.3011               | Non-Toxin               | <b>IAATRGATV</b>                           | 0.8883               | Non-Toxin               |
| <b>RLANECAQV</b>                           | 0.9246               | Non-Toxin               | <b>LSFKELLVY</b>                           | 0.7234               | Non-Toxin               | <b>AALTNNVAF</b>                           | 0.6381               | Non-Toxin               |
| <b>KQGDDYVYL</b>                           | 0.4041               | Non-Toxin               | <b>TVKPGNFNK</b>                           | 1.3778               | Non-Toxin               | <b>KPGNFNKDF</b>                           | 0.8932               | Non-Toxin               |
| <b>QLLFVVEVV</b>                           | 0.821                | Non-Toxin               | <b>AIDAYPLTK</b>                           | 0.5972               | Non-Toxin               | <b>SAKNRARTV</b>                           | 0.9661               | Non-Toxin               |
| <b>SVLYYQNNV</b>                           | 0.5524               | Non-Toxin               | <b>CSLSHRFYR</b>                           | 0.629                | Non-Toxin               | <b>FAYTKRNVI</b>                           | 1.0296               | Non-Toxin               |
| <b>RLSFKELLV</b>                           | 0.8643               | Non-Toxin               | <b>TITQMNLKY</b>                           | 1.6155               | Non-Toxin               |                                            |                      |                         |
| <b>HMLDMYSVM</b>                           | 0.5853               | Non-Toxin               | <b>RVCGVSAAR</b>                           | 0.6078               | Non-Toxin               |                                            |                      |                         |
| <b>VVDSYYSLL</b>                           | 0.5381               | Non-Toxin               | <b>ATVVIGTSK</b>                           | 0.7566               | Non-Toxin               |                                            |                      |                         |
|                                            |                      |                         | <b>RAFDIYNDK</b>                           | 0.5993               | Non-Toxin               |                                            |                      |                         |
|                                            |                      |                         | <b>NLKYAISAK</b>                           | 1.3508               | Non-Toxin               |                                            |                      |                         |
|                                            |                      |                         | <b>SQGLVASIK</b>                           | 0.6336               | Non-Toxin               |                                            |                      |                         |
|                                            |                      |                         | <b>VVIGTSKFY</b>                           | 0.7146               | Non-Toxin               |                                            |                      |                         |
|                                            |                      |                         | <b>LMPILTLTR</b>                           | 0.9617               | Non-Toxin               |                                            |                      |                         |
|                                            |                      |                         | <b>RLSFKELLV</b>                           | 0.8643               | Non-Toxin               |                                            |                      |                         |
|                                            |                      |                         | <b>VVSTGYHFR</b>                           | 1.4741               | Non-Toxin               |                                            |                      |                         |
|                                            |                      |                         | <b>VVYRAFDIY</b>                           | 0.7331               | Non-Toxin               |                                            |                      |                         |
|                                            |                      |                         | <b>DVFHLYLQY</b>                           | 0.6321               | Non-Toxin               |                                            |                      |                         |
|                                            |                      |                         | <b>MVPHISRQR</b>                           | 0.4279               | Non-Toxin               |                                            |                      |                         |
|                                            |                      |                         | <b>SICSTMTNR</b>                           | 1.1164               | Non-Toxin               |                                            |                      |                         |
|                                            |                      |                         | <b>KLHDELTGH</b>                           | 0.4147               | Non-Toxin               |                                            |                      |                         |

## Supplementary Figures:

MRTSYLLLF<sup>T</sup>LC<sup>L</sup>LLSEMASGGN<sup>F</sup>LTGLGHRSDHYNCVSSGGQCLYSACPIFTKI<sup>Q</sup>GTCYRGKAK<sup>C</sup>CK  
EAAAK<sup>M</sup>MLDMYSV<sup>M</sup>LAAY<sup>R</sup>QLLFVVEVAAYRLANECAQV<sup>A</sup>AYS<sup>V</sup>LYYQNNV<sup>A</sup>AY<sup>R</sup>LSFKELLVAA  
YLSFKELLV<sup>A</sup>AYTVKPGNFNKAAY<sup>R</sup>VCGVSAARAAYATV<sup>V</sup>IGTSKAAYNLKYAISAKAAY<sup>R</sup>LSFKEL  
LV<sup>A</sup>AYVVSTGYHFRAAYKLHDELTGH<sup>A</sup>AYATRGATV<sup>V</sup>IAAYMPILTLTRAAYIAATRGATV<sup>A</sup>AYA  
ALTNNVAF<sup>A</sup>AYFAYTKRNVIGPGPGNMLRIMASLV<sup>L</sup>LARKHGPGPGNMLRIMASLV<sup>L</sup>LARKGPGP  
GQMNLKYAISAKNRARGPGPGMNLKYAISAKNRARTGPGPGNLKYAISAKNRARTVGP<sup>G</sup>PGDSY  
YSLMPILTLTRGPGPGMLRIMASLV<sup>L</sup>LARKHTGPGPGLRIMASLV<sup>L</sup>LARKHTTGPGPGLMPILTLTRA  
LTAESGPGPGITQMNLKYAISAKNRKKAQDGNAAISDYDYRYKKDKYFDCYDGGCINANQKKHF  
RELGVVHNQDVNLH

**Supplementary Figure S1.** The designed vaccine construct sequence. The sequence of epitopes in the designed vaccine is: Adjuvant-CTL epitopes-HTL epitopes-B cell epitopes. The first 68 amino acids are occupied by the adjuvant,  $\beta$ -defensin 1 (Blue color), next 5 amino acids are of EAAAK linker (Orange color) and the amino acids from 74-286 constitute the CTL epitopes (Red color) whereas the amino acids from 287-486 and from 487-540 correspond to HTL (Green color) and B-cell epitopes (Black color), respectively. All the linkers, except EAAAK are represented in purple color.

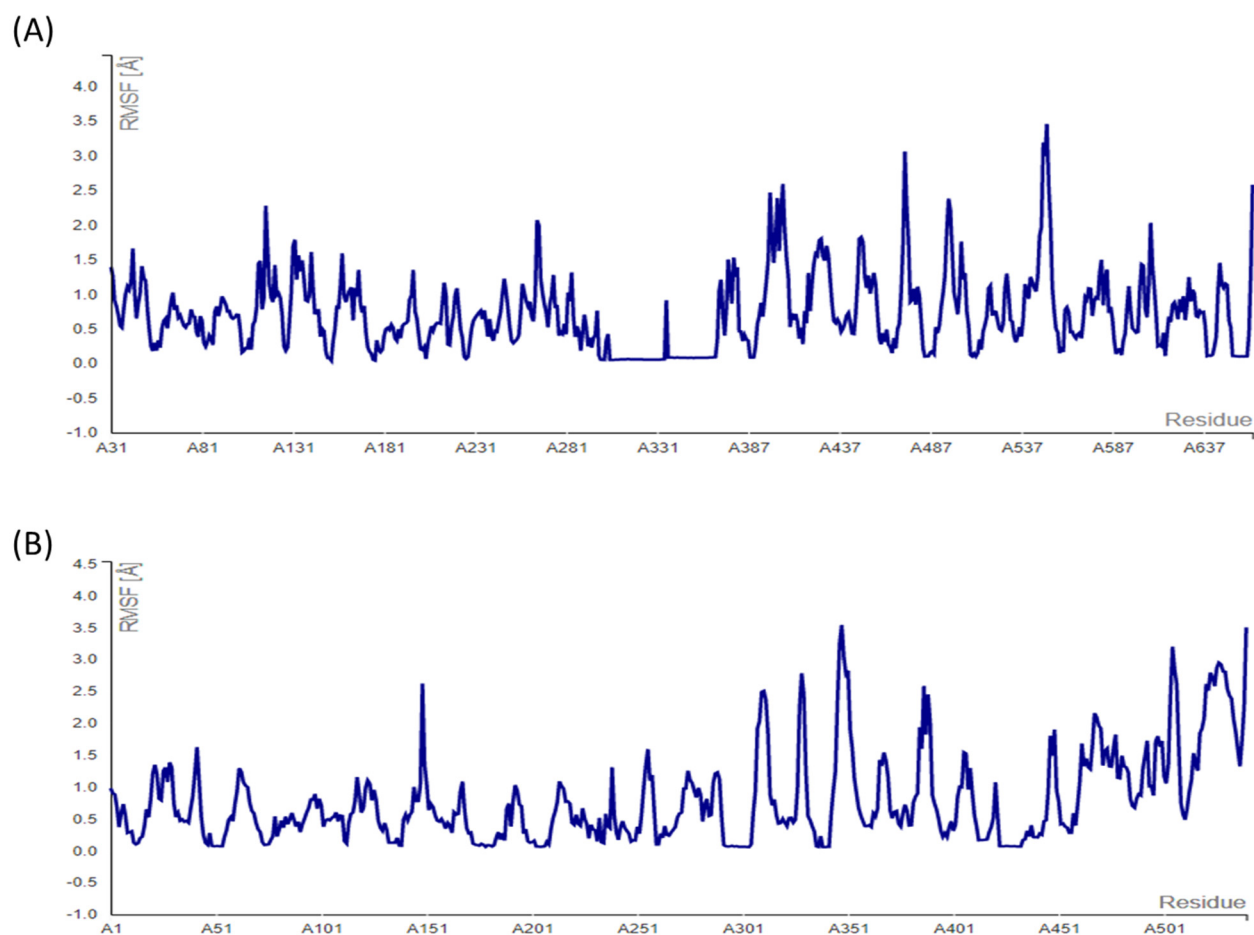

**Supplementary Figure S2.** Molecular dynamics simulations of the docked complex (TLR3-Designed vaccine). (A) The root-mean-square fluctuation (RMSF) values of the amino acid residues of Chain A (TLR3) of the docked complex. (B) RMSF values of the amino acid residues of Chain B (designed vaccine) of the docked complex.
